# Supplementary material
Source: PubMed Central journal article supplement (PMC3924795)
Supplement: Supp_Fig1.pdf [file Supp_Fig1.pdf]

## Supplementary Data

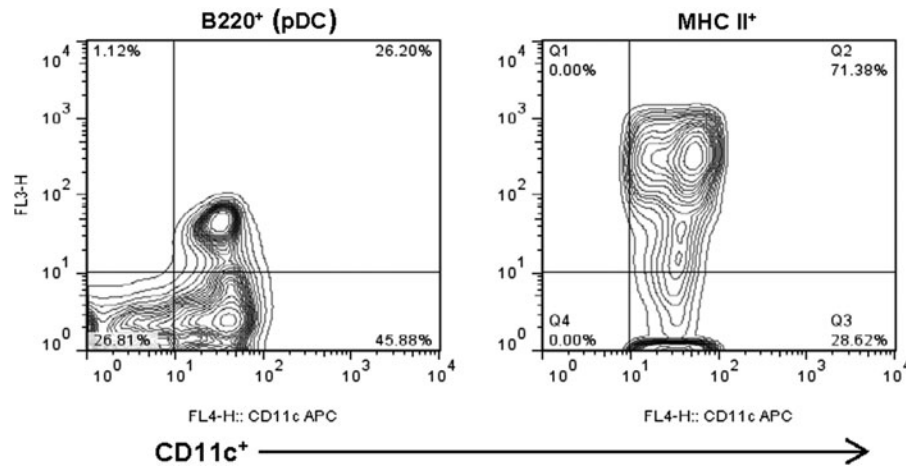

**SUPPLEMENTARY FIG. S1.** Flow cytometry profile of BMDCs tested in this work. BMDCs were stained with antibody against CD11c, B220, or MHCII and detected in the FACSCalibur analyzed by Flowjo software. CD11c<sup>+</sup> and B220<sup>+</sup> cells represent pDCs. Similar data were obtained by 3 independent analyses. BMDCs, bone marrow-derived DCs.
