# Supplementary material
Source: PubMed Central journal article supplement (PMC3924795)
Supplement: Supp_Fig2.pdf [file Supp_Fig2.pdf]

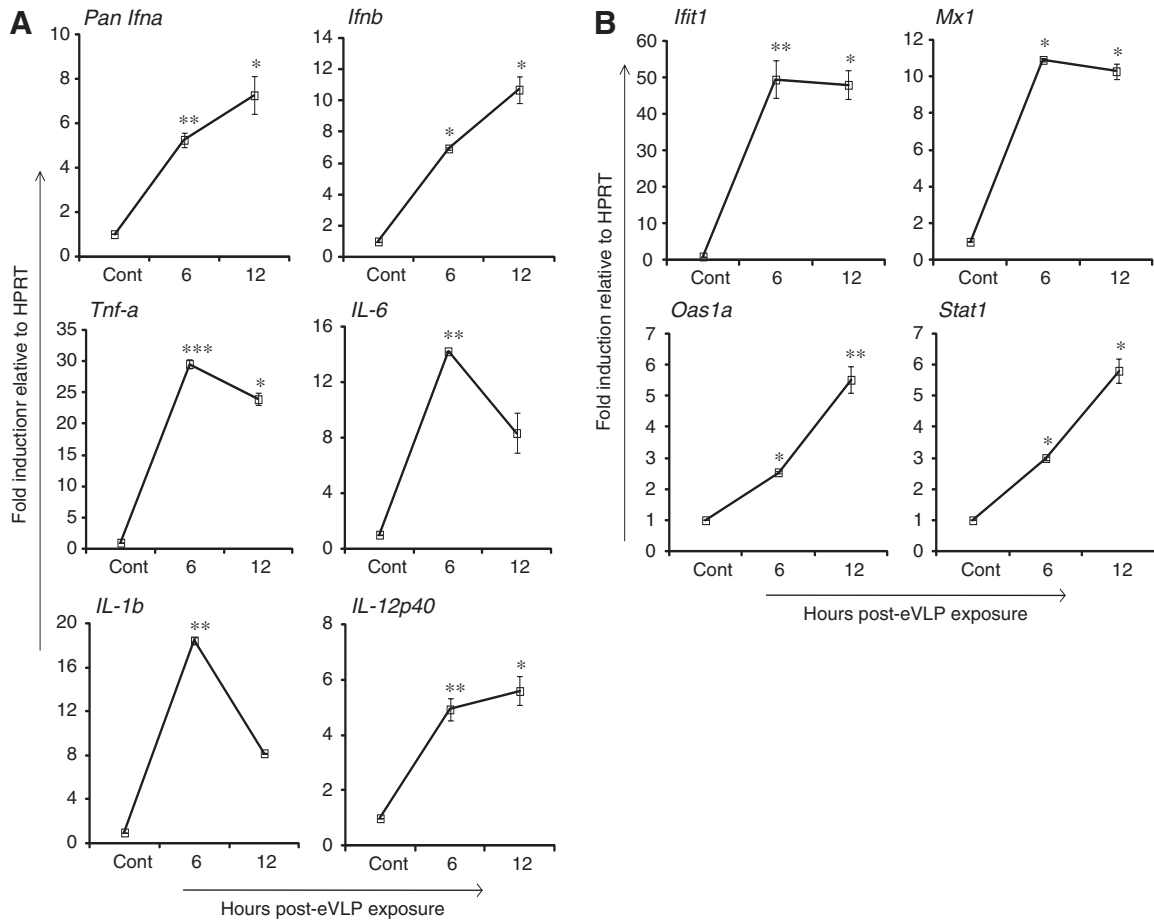

**SUPPLEMENTARY FIG. S2.** (A) eVLP induce type I IFNs, proinflammatory cytokines, and (B) IFN-mediated ISGs mRNA in BMMΦs. BMMΦs were generated in the presence of M-CSF and primed with IFN $\gamma$  for 24 h and stimulated with eVLP (10  $\mu$ g/mL) for 6 and 12 h. Cont. represents unstimulated cells. Expression of indicated cytokine genes were measured as described in Fig. 1. Data represent the mean of duplicate samples from 3 experiments  $\pm$  SEM. eVLP, Ebola virus-like particles; IFNs, interferons; ISGs, IFN-stimulated genes; M-CSF, macrophage-colony stimulating factor. All data were assessed by Student's *t* test and are denoted by \*\*\* $P \leq 0.001$ , \*\* $P \leq 0.01$  and \* $P \leq 0.05$ .
