# Supplementary material
Source: PubMed Central journal article supplement (PMC3924795)
Supplement: Supp_Fig3.pdf [file Supp_Fig3.pdf]

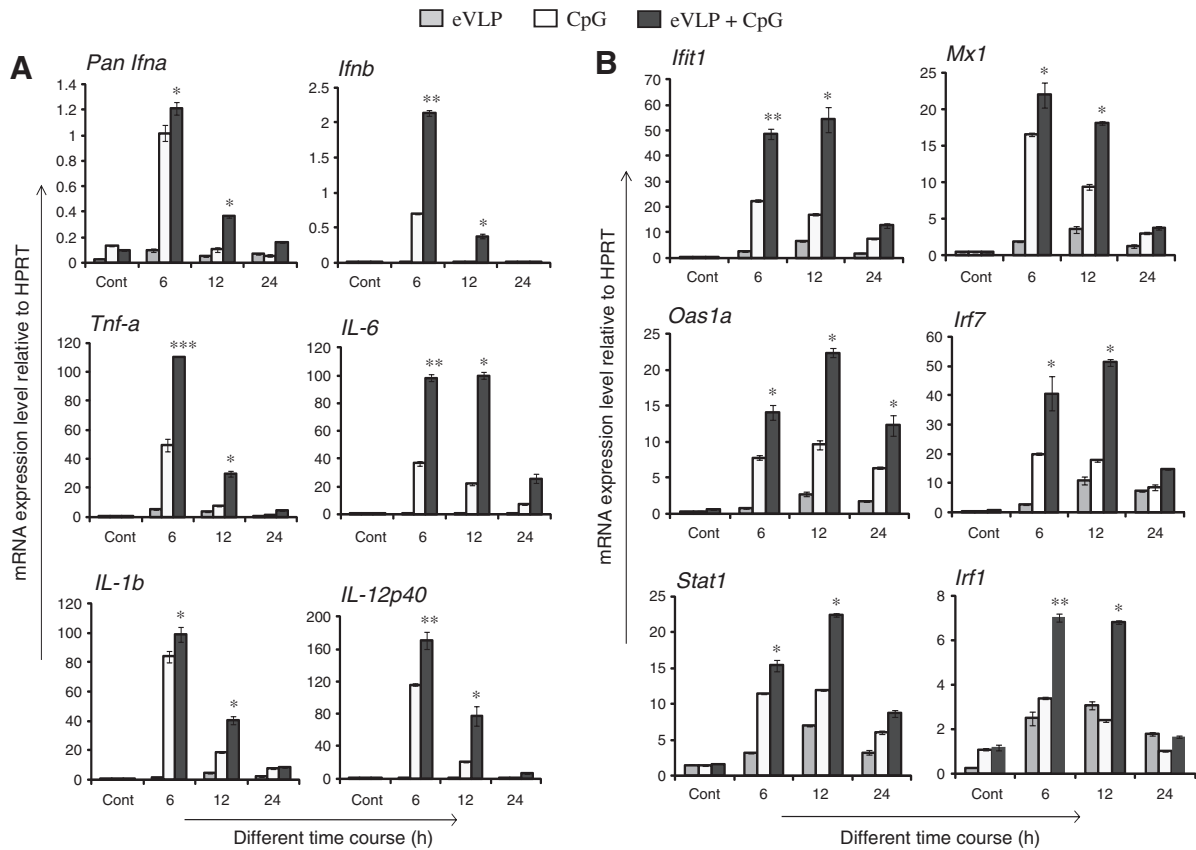

**SUPPLEMENTARY FIG. S3.** eVLP enhance cytokine induction when combined with CpG DNA. BMDCs were treated with eVLP (1  $\mu\text{g}/\text{mL}$ ) for 1 h followed by additional treatment with CpG-B DNA (1  $\mu\text{g}/\text{mL}$ ) for 6, 12, and 24 h. Induction of indicated cytokines (A) and ISGs (B) at different time points (h) were measured as described in Fig. 1. Data represent the mean of duplicate samples from 3 experiments  $\pm$  SEM. All data were assessed by Student's *t* test and are denoted by \*\*\* $P \leq 0.001$ , \*\* $P \leq 0.01$  and \* $P \leq 0.05$ .
